# Supplementary material
Source: PubMed Central journal article supplement (PMC8820440)
Supplement: int-0065-0001-s01.pdf [file int-0065-0001-s01.pdf]

## Supplementary information

Emergence of novel reassortant H5N3 avian influenza viruses in Korean Mallard ducks in 2018

Seon-Ju Yeo\*, Vui Thi Hoang\*, Duong Tuan Bao\*<sup>1</sup>, Ngoc Minh Nguyen<sup>1</sup>, Hien Thi Tuong<sup>1</sup>, Mudsser Azam, Haan Woo Sung§, Hyun Park§

Table S1. Detailed NGS analysis of KNU18-91 isolate

| Reference |             |                                                       |              |        | Sequenced Sample         |                                      |                                |               |          |                    |          |             | R_ORF  |            |            | S_ORF  |            |            |
|-----------|-------------|-------------------------------------------------------|--------------|--------|--------------------------|--------------------------------------|--------------------------------|---------------|----------|--------------------|----------|-------------|--------|------------|------------|--------|------------|------------|
| Segment#  | gene name   | desc.                                                 | Accession_ID | ref bp | # of Pre-processed reads | # of Influenza Virus extracted reads | # of non-Influenza Virus reads | Virus reads % | #M_Reads | Unique Matches (%) | S_Con_bp | %Cov. (S/R) | Length | S_position | E_position | Length | S_position | E_position |
| 1         | PB2         | A/greater white-fronted goose/Netherlands/5/2010/H5N3 | KX979214     | 2,341  | 19369890                 | 735257                               | 18634633                       | 0.03946       | 24,228   | 4.0                | 2,353    | 98.97       | 2,307  | 1          | 2,307      | 2,088  | 228        | 2,315      |
| 2         | PB1, PB1-F2 |                                                       | KX979754     | 2,341  |                          |                                      |                                |               | 11,483   | 1.9                | 2,315    | 98.89       | 2,274  | 25         | 2,298      | 2,274  | 18         | 2,291      |
| 3         | PA, PA-X    |                                                       | KX977828     | 2,233  |                          |                                      |                                |               | 19,656   | 3.3                | 2,226    | 99.69       | 2,157  | 19         | 2,175      | 2,157  | 12         | 2,168      |
| 4         | HA          |                                                       | KX978851     | 1,767  |                          |                                      |                                |               | 95,971   | 16.00              | 1,764    | 99.94       | 1,704  | 20         | 1,723      | 1,704  | 17         | 1,720      |
| 5         | NP          |                                                       | KX978800     | 1,565  |                          |                                      |                                |               | 170,535  | 28.40              | 1,595    | 98.40       | 1,542  | 1          | 1,542      | 1,548  | 21         | 1,568      |
| 6         | NA          |                                                       | KX979439     | 1,453  |                          |                                      |                                |               | 11,718   | 2.00               | 1,419    | 97.87       | 1,428  | 1          | 1,428      | 1,416  | 3          | 1,418      |
| 7         | M2, M1      |                                                       | KX978221     | 1,027  |                          |                                      |                                |               | 249,453  | 41.60              | 1,029    | 99.03       | 762    | 23         | 784        | 786    | 1          | 786        |
| 8         | NEP, NS1    |                                                       | KX977601     | 890    |                          |                                      |                                |               | 427      | 0.10               | 839      | 93.26       | 717    | 3          | 719        | 564    | 30         | 593        |

a. 12hpi

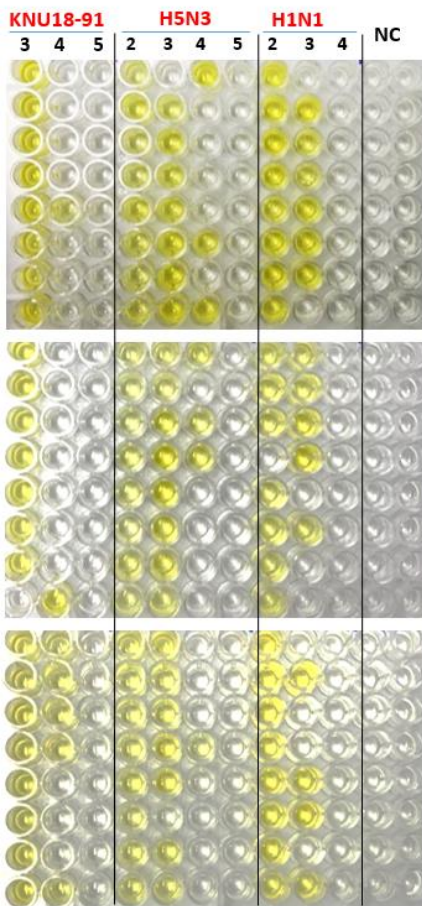

b. 24hpi

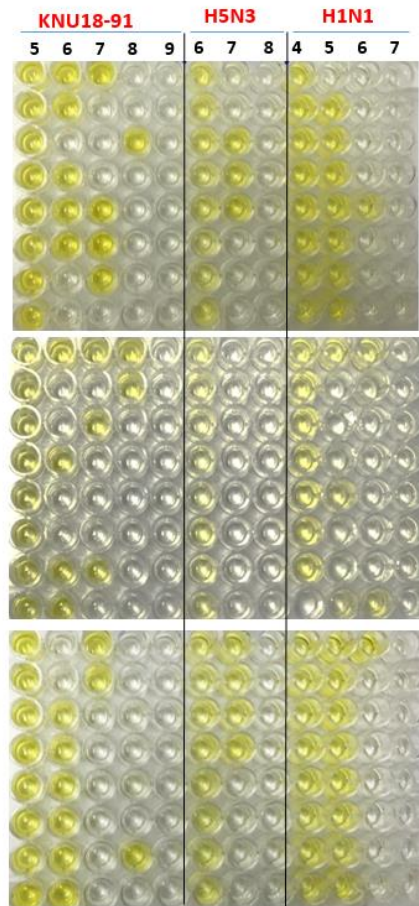

c. 36hpi

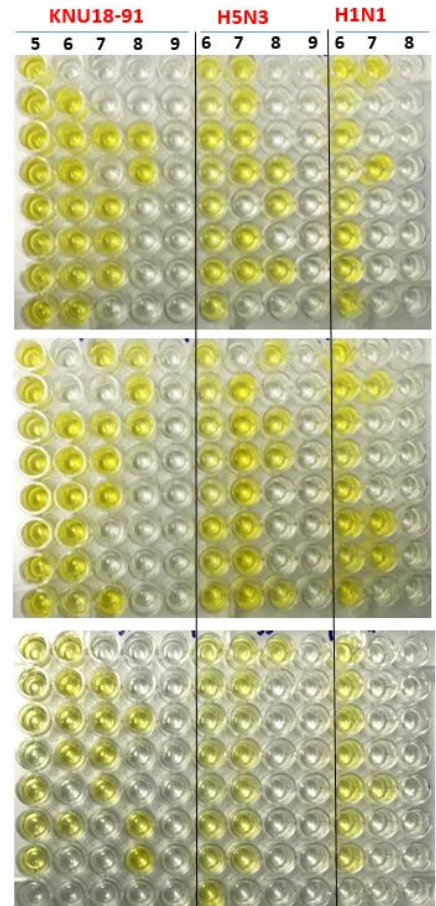

d. 48hpi

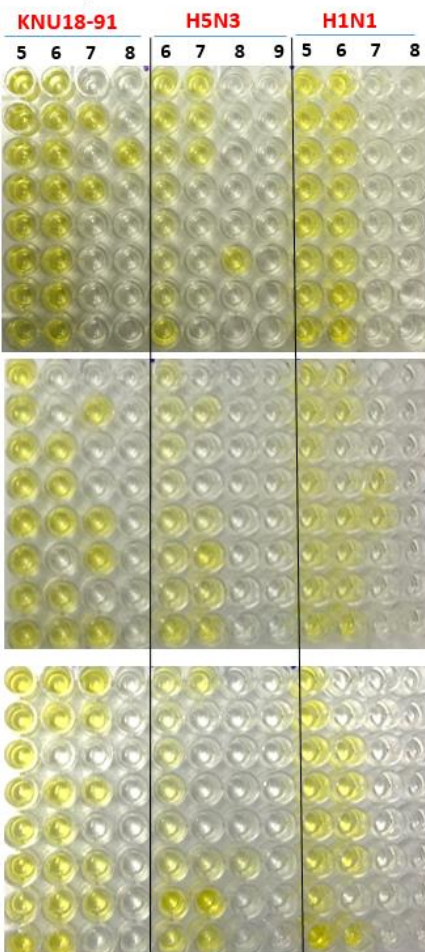

e. 60hpi

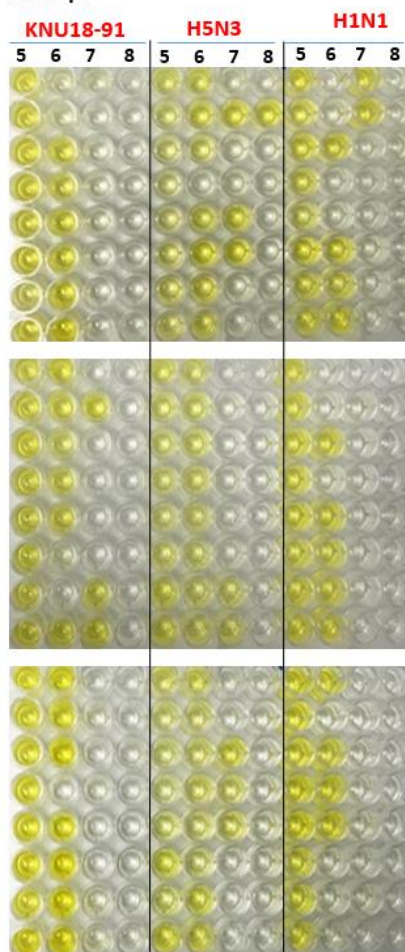

f. 72hpi

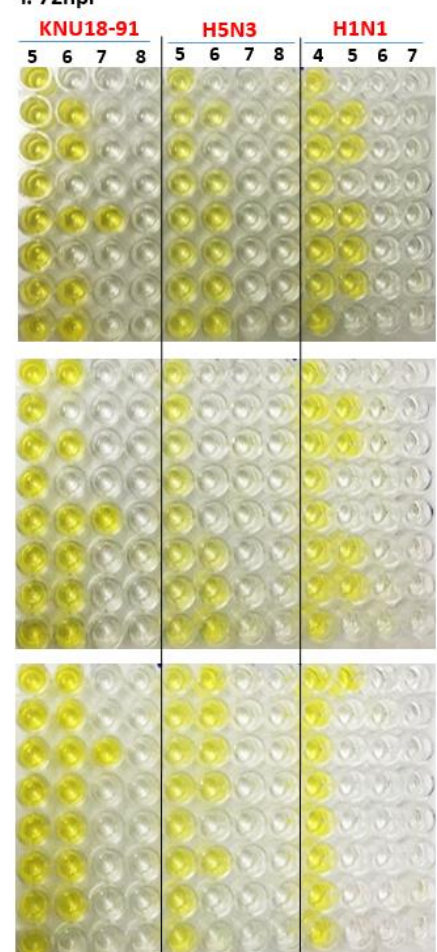

**Fig. S1. Raw ELISA data to conduct TCID<sub>50</sub> assay.** KNU18-91, H5N3, H1N1 were infected to MDCK cells at MOI=0.01, Infected supernatants were collected at each 12hpi for 72 hours. Serial 10-fold dilutions of three different viruses' supernatant at different hpi. KNU18-91 (a-f), H5N3 (g-l), and H1N1 (m-r) were infected MDCK for 3 dpi., cell monolayers were fixed with 80% acetone and then blocked with 5% non-fat milk. Cells were washed with PBST 3 times and incubated with 0.1 µg/well of anti-influenza nucleoprotein (Medix Biochemica, Finland) at 37°C, 1 hour. Wash cells by PBST 3 times, add secondary Ab in the form of horseradish peroxidase (HRP)-conjugated rabbit anti-mouse IgG (Abcam, Cambridge, UK), incubated at 37°C, 1 hour. Cell then were washed with PBS-T for five times to remove nonspecific binding and 100 µL of 3,3',5,5'-tetra methyl benzidine (Sigma-Aldrich) substrate solution was added, it was followed by 100 µL of H<sub>2</sub>SO<sub>4</sub> 0.18M solution to stop reaction.

3: 10<sup>3</sup>- fold dilution of stock;

4: 10<sup>4</sup>- fold dilution of stock;

5: 10<sup>5</sup>- fold dilution of stock;

6: 10<sup>6</sup>- fold dilution of stock;

7: 10<sup>7</sup>- fold dilution of stock;

8: 10<sup>8</sup>- fold dilution of stock;

9: 10<sup>9</sup>- fold dilution of stock;

10: 10<sup>10</sup>- fold dilution of stock;

NC: negative control (uninfected virus);

a.

KNU18-91 (3dpi)

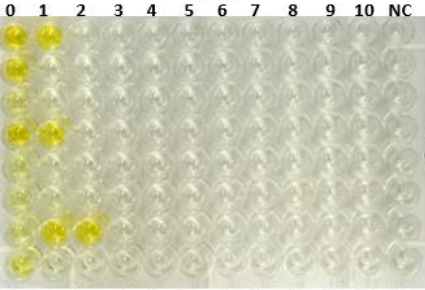

KNU18-91 (6dpi)

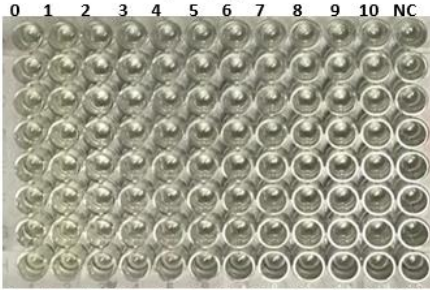

KNU18-91 (14dpi)

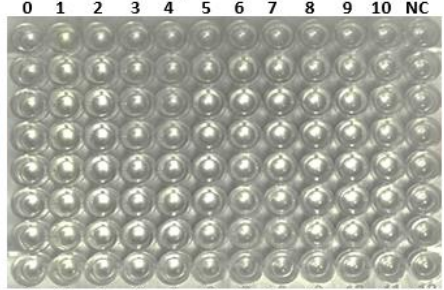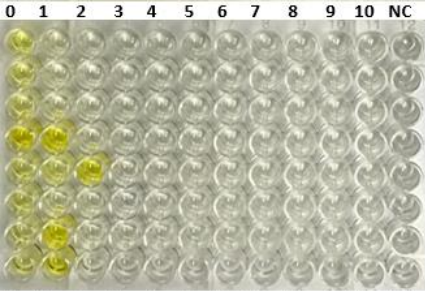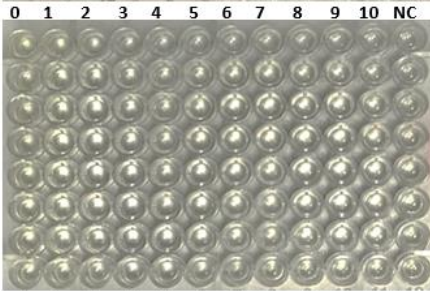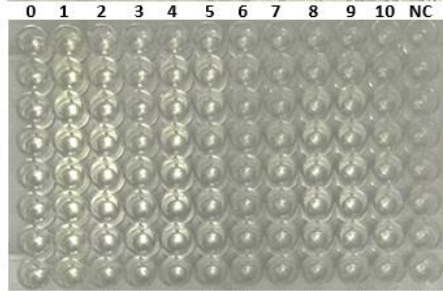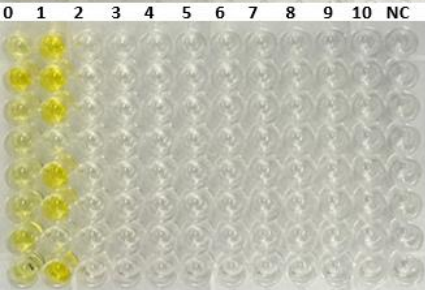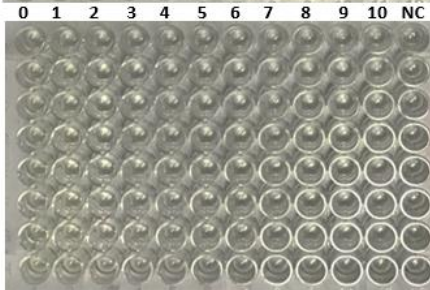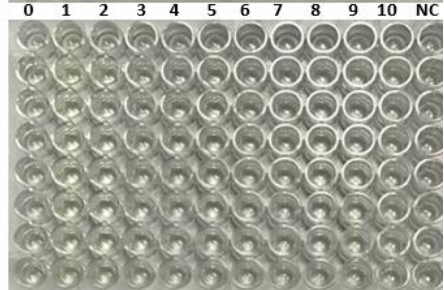

b.

H5N3 (3dpi)

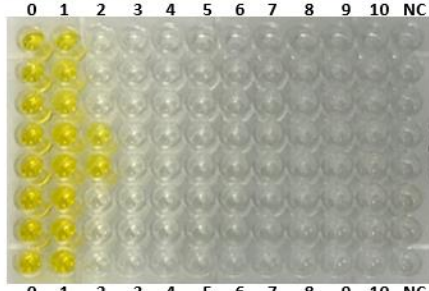

H5N3 (6dpi)

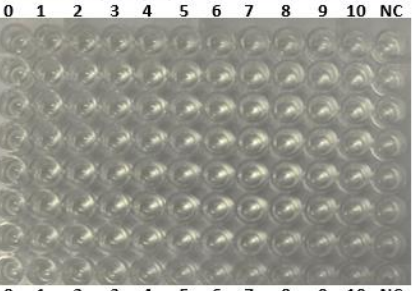

H5N3 (14dpi)

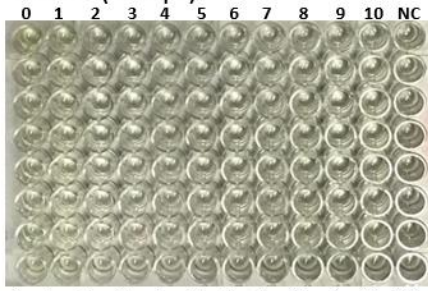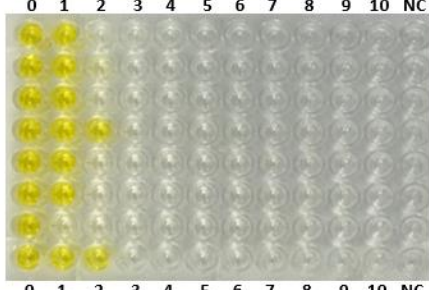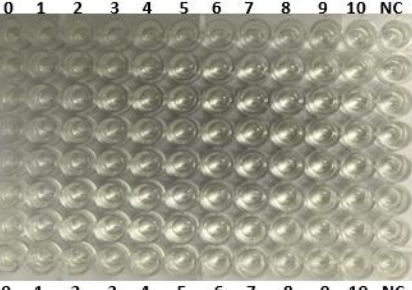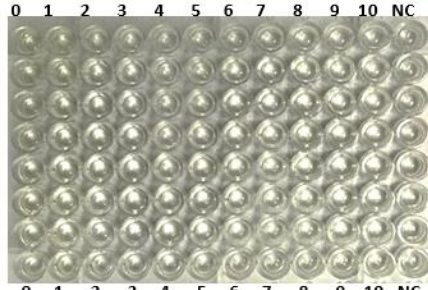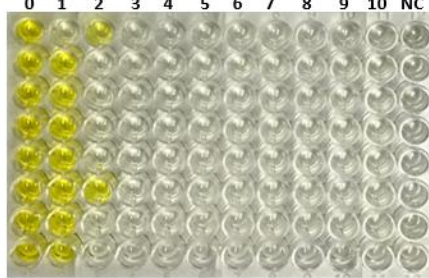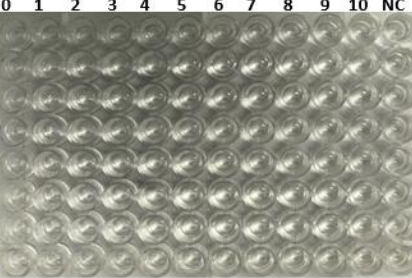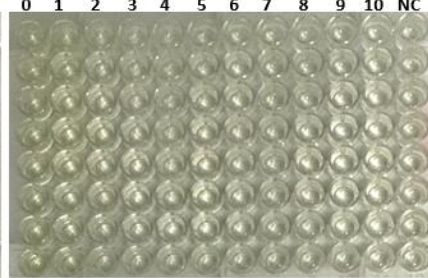

c.

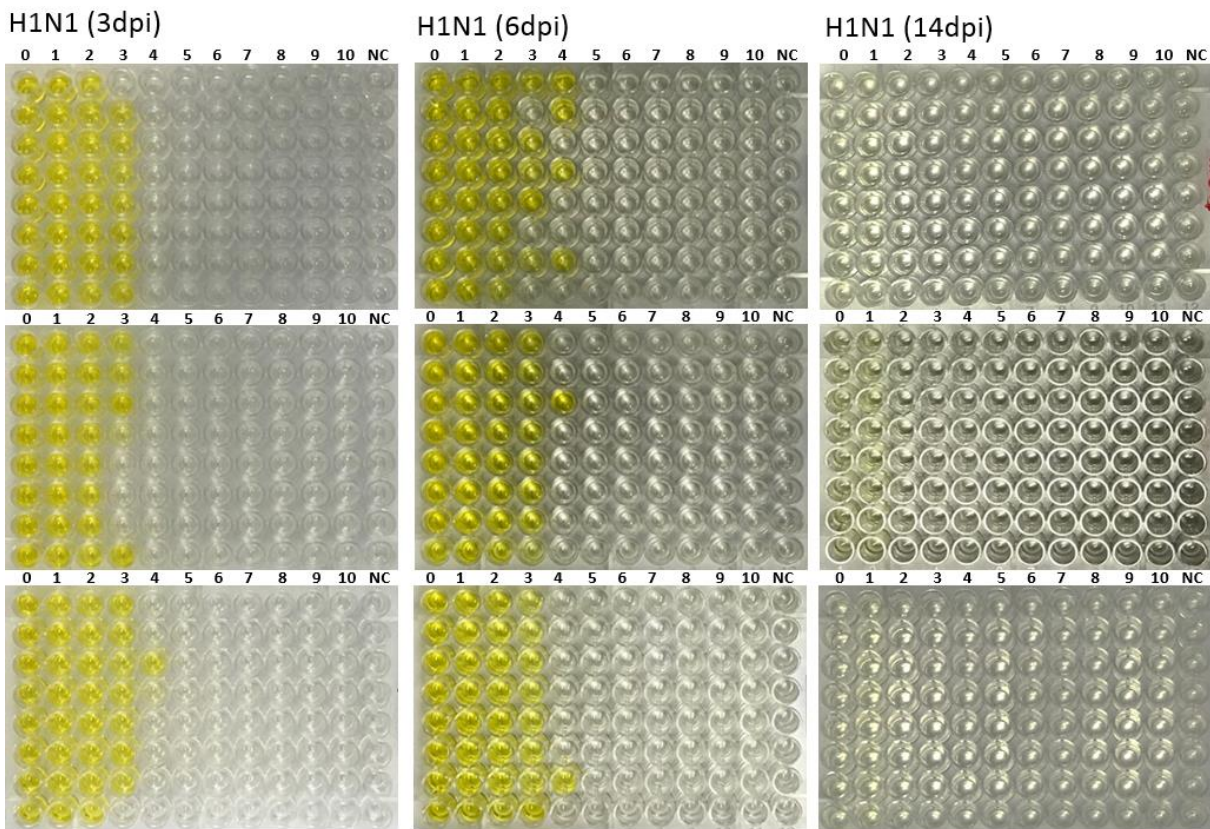

**Fig. S2. Raw ELISA data to conduct TCID<sub>50</sub> assay to measure virus titer in lung.** After 3, 6, 14 dpi of intranasal challenge of viruses into female Balb/c mice 8 weeks old (initial intranasal virus = 10<sup>4</sup> EID<sub>50</sub>/mouse). Mice lung were collected and virus titer (TCID<sub>50</sub>) was conducted by ELISA method (n=3)

0: 10<sup>0</sup>- fold dilution of stock;

1: 10<sup>1</sup>- fold dilution of stock;

2: 10<sup>2</sup>- fold dilution of stock;

3: 10<sup>3</sup>- fold dilution of stock;

4: 10<sup>4</sup>- fold dilution of stock;

5: 10<sup>5</sup>- fold dilution of stock;

6: 10<sup>6</sup>- fold dilution of stock;

7: 10<sup>7</sup>- fold dilution of stock;

8: 10<sup>8</sup>- fold dilution of stock;

9: 10<sup>9</sup>- fold dilution of stock;

10: 10<sup>10</sup>- fold dilution of stock;

NC: negative control (uninfected virus);

**Antigen:** K91 virus

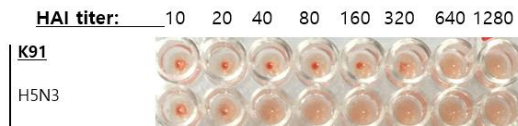

**Antigen:** SYG06/2006 (H5N3)virus

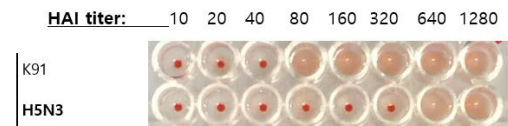

**Fig. S3. Hemagglutination assay.** The mouse antisera were treated with RDE and then serially diluted with PBS, mixed with 4 hemagglutination units of a virus, and incubated for 30 min at room temperature. The HI result was obtained from the highest serum sample dilution that inhibited hemagglutination.
